# Supplementary material
Source: PubMed Central journal article supplement (PMC2936053)
Supplement: jc.2010-0109_1.pdf [file jc.2010-0109_1.pdf]

Supplementary Table 1. Characteristics of women in the BioCycle study by tertile of baseline HDL and LDL cholesterol (n=259).

|                                      | Overall<br>N=259 | HDL Cholesterol tertile            |                                           |                                    | LDL Cholesterol tertile            |                                            |                                     | NCEP Guidelines - LDL Cholesterol*   |                                     |
|--------------------------------------|------------------|------------------------------------|-------------------------------------------|------------------------------------|------------------------------------|--------------------------------------------|-------------------------------------|--------------------------------------|-------------------------------------|
|                                      |                  | <44 mg/dL<br>(1.14 mmol/L)<br>n=86 | 44-54 mg/dL<br>(1.14-1.40 mmol/L)<br>n=85 | >54 mg/dL<br>(1.40 mmol/L)<br>n=86 | <92 mg/dL<br>(2.38 mmol/L)<br>n=87 | 92-107 mg/dL<br>(2.38-2.77 mmol/L)<br>n=84 | >107 mg/dL<br>(2.77 mmol/L)<br>n=86 | <130 mg/dL<br>(3.37 mmol/L)<br>n=224 | ≥130 mg/dL<br>(3.37 mmol/L)<br>n=33 |
| Age – yr † §                         | 27.3 ± 8.2       | 26.4 ± 7.8                         | 27.7 ± 8.2                                | 27.7 ± 8.6                         | 25.4 ± 7.5                         | 27.3 ± 8.2                                 | 29.2 ± 8.6                          | 26.6 ± 7.8                           | 32.1 ± 9.5                          |
| BMI – kg/m <sup>2</sup> † ‡ §        | 24.1 ± 3.9       | 25.3 ± 3.9                         | 23.7 ± 3.4                                | 23.1 ± 3.8                         | 23.6 ± 3.5                         | 23.6 ± 4.0                                 | 24.9 ± 3.8                          | 23.8 ± 3.7                           | 26.0 ± 3.8                          |
| Waist circumference – cm † ‡ §       | 74.7 ± 8.7       | 76.9 ± 9.0                         | 74.9 ± 7.3                                | 72.2 ± 8.9                         | 72.9 ± 7.3                         | 74.6 ± 9.4                                 | 76.6 ± 8.7                          | 74.1 ± 8.4                           | 78.9 ± 8.8                          |
| Race – n (%)                         |                  |                                    |                                           |                                    |                                    |                                            |                                     |                                      |                                     |
| White                                | 154 (59)         | 45 (52)                            | 52 (61)                                   | 56 (65)                            | 50 (57)                            | 51 (61)                                    | 52 (60)                             | 135 (60.3)                           | 18 (54.6)                           |
| African American                     | 51 (20)          | 19 (22)                            | 14 (16)                                   | 17 (20)                            | 20 (23)                            | 12 (14)                                    | 18 (21)                             | 40 (17.9)                            | 10 (30.3)                           |
| Other                                | 54 (21)          | 22 (26)                            | 19 (22)                                   | 13 (15)                            | 17 (20)                            | 21 (25)                                    | 16 (19)                             | 49 (21.9)                            | 5 (15.2)                            |
| Married – n (%)                      | 66 (26)          | 14 (16)                            | 24 (28)                                   | 27 (31)                            | 18 (21)                            | 20 (24)                                    | 27 (31)                             | 54 (24.1)                            | 11 (33.3)                           |
| Physical activity category – n (%) § |                  |                                    |                                           |                                    |                                    |                                            |                                     |                                      |                                     |
| Low                                  | 25 (10)          | 9 (10)                             | 8 (9)                                     | 8 (9)                              | 11 (13)                            | 4 (5)                                      | 10 (12)                             | 23 (10.3)                            | 2 (6.1)                             |
| Moderate                             | 92 (36)          | 34 (40)                            | 28 (33)                                   | 30 (35)                            | 20 (23)                            | 39 (46)                                    | 33 (38)                             | 78 (34.8)                            | 14 (42.4)                           |
| High                                 | 142 (55)         | 43 (50)                            | 49 (58)                                   | 48 (56)                            | 56 (64)                            | 41 (49)                                    | 43 (50)                             | 123 (54.9)                           | 17 (51.5)                           |
| Energy – kcal †                      | 1603.5 ± 397.7   | 1582.8 ± 383.1                     | 1604.9 ± 421.1                            | 1625.5 ± 396.0                     | 1638.0 ± 375.5                     | 1614.1 ± 445.5                             | 1560.9 ± 374.4                      | 1603.7 ± 402.6                       | 1609.0 ± 380.8                      |
| Nulliparous – n (%)                  | 187 (74)         | 64 (75)                            | 61 (73)                                   | 61 (73)                            | 69 (80)                            | 61 (74)                                    | 56 (67)                             | 168 (76.0)                           | 18 (60.0)                           |
| Current smoker – n (%)               | 10 (3.9)         | 3 (3)                              | 3 (3)                                     | 4 (5)                              | 3 (3)                              | 4 (5)                                      | 3 (3)                               | 9 (4.0)                              | 1 (3.0)                             |

BMI, body mass index; HDL, high density lipoprotein; LDL, low density lipoprotein; NCEP, National Cholesterol Education Program.

\* LDL Cholesterol <130 mg/dL (3.37 mmol/L) is considered “optimal” or “near optimal/above optimal” and ≥130 mg/dL (3.37 mmol/L) is considered “borderline high,” “high,” or “very high” according to the NCEP.

† Values are mean ± SD; ‡ HDL cholesterol p-value <0.05; § LDL cholesterol p-value <0.05; || NCEP p-value <0.05.
